# Supplementary material
Source: publisher figshare collection journal article supplement (https://acs.figshare.com/ndownloader/files/4070425)

# Figure S1

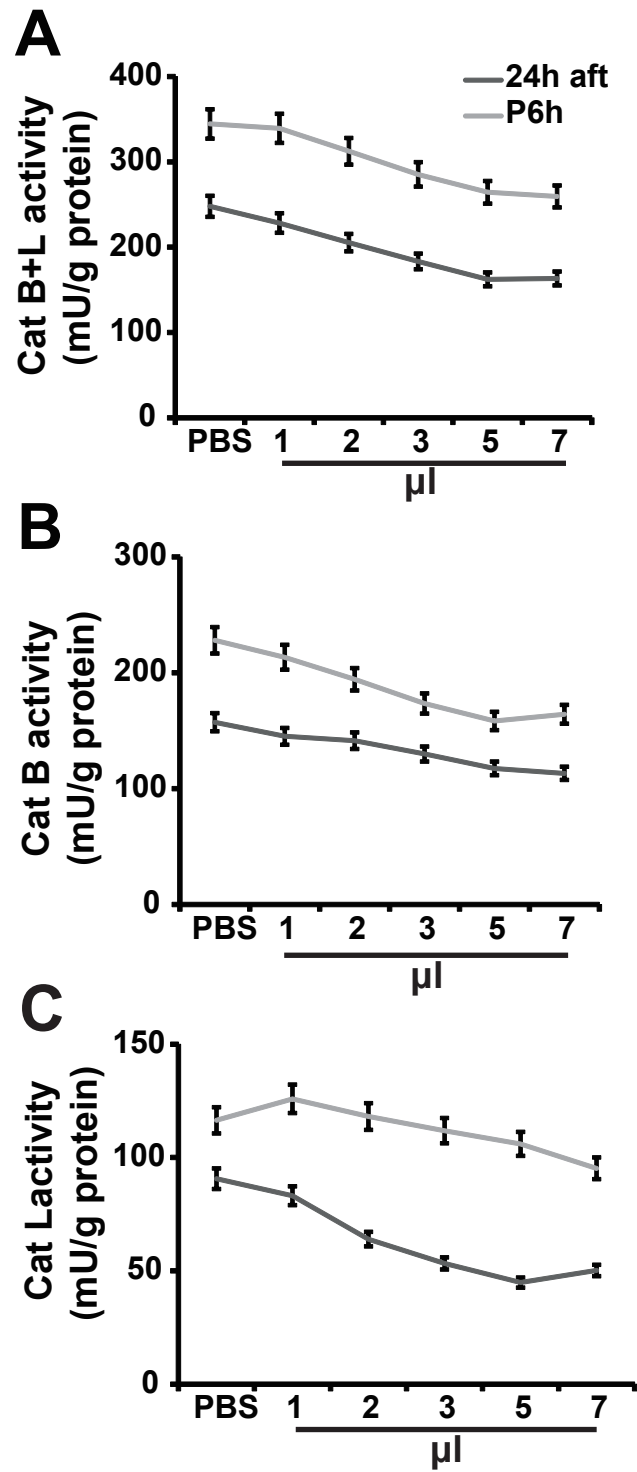

Supplement: Supplementary file 1 [file 4070425]
